# Supplementary material for: Long-term in situ measurements of NO x and NO y at Jungfraujoch 1998–2009: time series analysis and evaluation
Source: Copernicus journal article supplement (doi:10.5194/acp-12-2551-2012), 2012-03-07
Supplement: Supplementary file 1 [file acp-12-2551-2012-supplement.pdf]

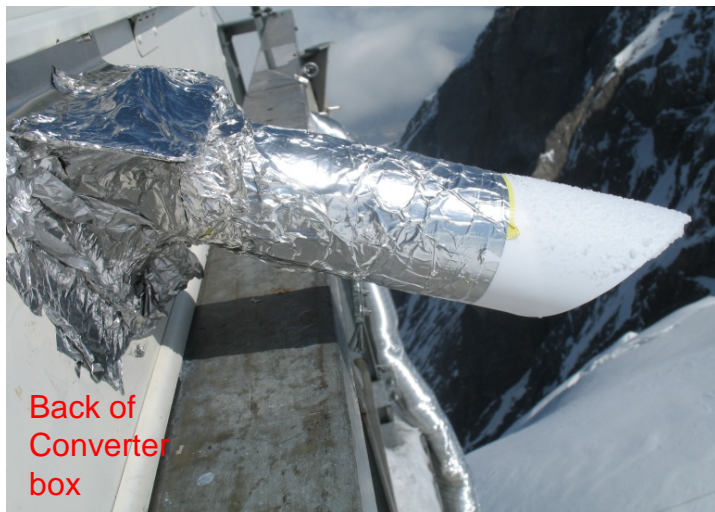

Campaign (ETH) sampling inlet

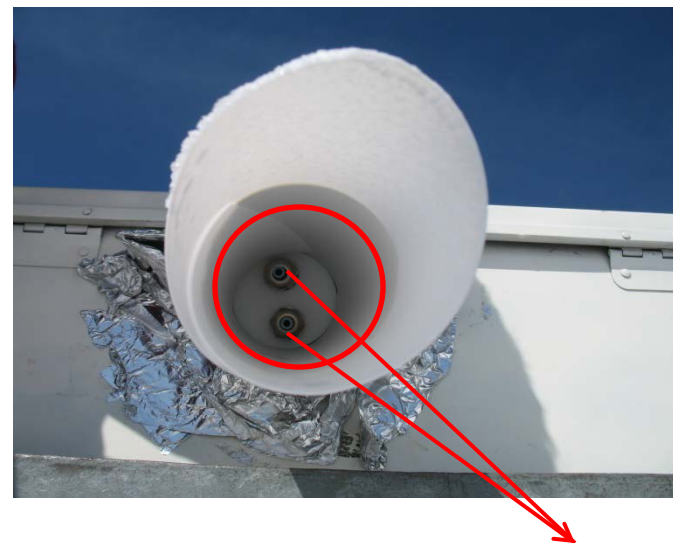

ETH sampling inlet (front view)

NO and NO<sub>y</sub> sampling line

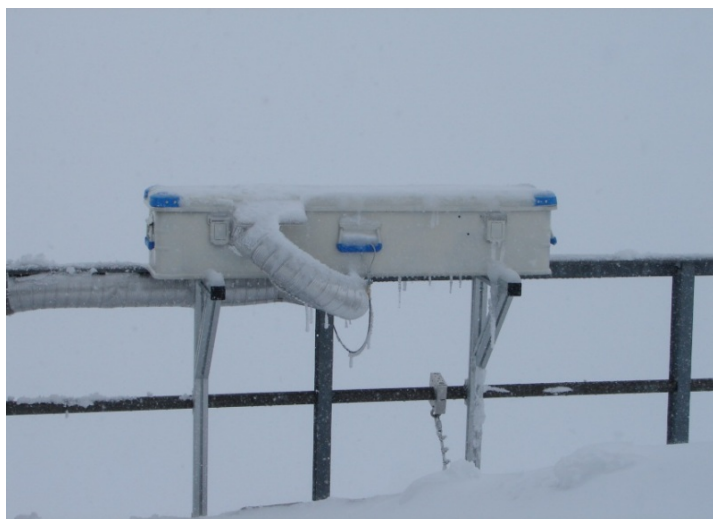

Campaign gold converter box and sampling inlet (back side)

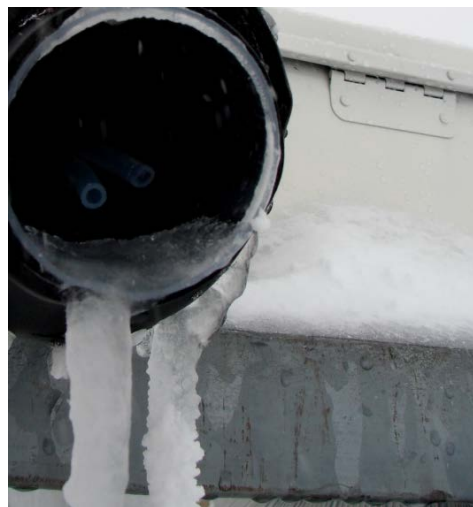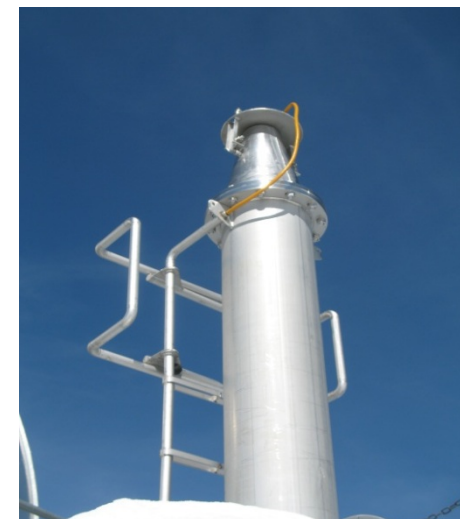

Snow in the inlet (left) and EMPA's NO<sub>y</sub> sampling inlet (right)
